# Supplementary material for: On the Diversity of Malaria Parasites in African Apes and the Origin of Plasmodium falciparum from Bonobos
Source: PLoS Pathog. 2010 Feb 12;6(2):e1000765. doi: 10.1371/journal.ppat.1000765 (PMC2820532; doi:10.1371/journal.ppat.1000765)
Supplement: Table S1 — Origin of the blood samples that yielded Plasmodium sequences (name in bold and GenBank Accession number in parentheses). (0.09 MB PDF) [file ppat.1000765.s002.pdf]

Table S1. Origin of the blood samples that yielded *Plasmodium* sequences (name in bold and GenBank Accession number in parentheses).

| Country                          | Host Species                  | Ape Name | <i>P. falciparum</i>                            |                                                                 |                                                                                                                  | <i>P. reichenowi</i>                     |                           |                                              | <i>P. billicollinsi</i>                |                                                   |                                                                                                                              | <i>P. billbrayi</i>                                                                  |                      | <i>P. malariae</i> type | <i>P. vivax</i> type |
|----------------------------------|-------------------------------|----------|-------------------------------------------------|-----------------------------------------------------------------|------------------------------------------------------------------------------------------------------------------|------------------------------------------|---------------------------|----------------------------------------------|----------------------------------------|---------------------------------------------------|------------------------------------------------------------------------------------------------------------------------------|--------------------------------------------------------------------------------------|----------------------|-------------------------|----------------------|
|                                  |                               |          | <i>mitochondrial</i>                            | <i>Pf</i> <i>dhfr</i> - <i>n</i> (partial 1041 bp) <sup>a</sup> | <i>Pf</i> <i>msp2</i> block 3                                                                                    | <i>mitochondrial</i>                     | <i>Prdhfr</i> - <i>ts</i> | <i>Prmsp2</i> block 3                        | <i>mitochondrial</i>                   | <i>"Pbc"</i> <i>dhfr</i> - <i>ts</i> <sup>b</sup> | <i>Psp?</i> <i>msp2</i> block 3 <sup>c</sup>                                                                                 | <i>"Pbb"</i> <i>dhfr</i> - <i>ts</i> <sup>b</sup>                                    | <i>mitochondrial</i> | <i>mitochondrial</i>    | <i>mitochondrial</i> |
| Uganda                           | <i>Pan. t. schweinfurthii</i> | NL       |                                                 |                                                                 |                                                                                                                  |                                          |                           | Prmsp2- A1 (GU075719)                        |                                        |                                                   |                                                                                                                              |                                                                                      | UG (B1) (GQ355470)   |                         | UG (B2) (GQ355481)   |
| Uganda                           | <i>Pan. t. schweinfurthii</i> | JK       |                                                 |                                                                 |                                                                                                                  |                                          |                           | Prmsp2- A3 (GU075721)                        | UG (D2) (GQ355477)                     |                                                   | msp2-KNP-A1 (GU075722)<br>msp2-KNP-A2 (GU075723)<br>msp2-KNP-B (GU075724)<br>msp2-KNP-C1 (GU075725)<br>msp2-KNP-D (GU075726) | UG (D1) (GQ355471)                                                                   |                      |                         |                      |
| Uganda                           | <i>Pan. t. schweinfurthii</i> | OK       |                                                 |                                                                 |                                                                                                                  |                                          |                           | Prmsp2-A1 (GU075719)<br>Prmsp2-A2 (GU075720) | UG (F) (GQ355478)                      |                                                   | msp2-KNP-A1 (GU075722)<br>msp2-KNP-B (GU075724)                                                                              |                                                                                      |                      |                         |                      |
| Democratic Republic of the Congo | <i>Pan t. troglodytes</i>     | Gari     |                                                 |                                                                 |                                                                                                                  |                                          |                           |                                              |                                        |                                                   |                                                                                                                              |                                                                                      |                      |                         | DRC (L) (GQ355480)   |
| Democratic Republic of the Congo | <i>Pan t. troglodytes</i>     | Itaito   |                                                 |                                                                 |                                                                                                                  |                                          |                           |                                              | DRC (I) (GQ355479) DRC (Id) (GQ369534) |                                                   |                                                                                                                              |                                                                                      |                      |                         |                      |
| Democratic Republic of the Congo | <i>Pan t. troglodytes</i>     | Shegue   |                                                 |                                                                 |                                                                                                                  | DRC (S3) (GQ355476) DRC (Sd1) (GQ369532) |                           |                                              |                                        |                                                   | msp2-KNP-A3 (GU131994)<br>msp2-KNP-C2 (GU131995)                                                                             | DRC (Sd2) (GQ369535) DRC (S1) (GQ355468)<br>DRC (Sd3) (GQ369536) DRC (S2) (GQ355469) |                      |                         |                      |
| Democratic Republic of the Congo | <i>Pan paniscus</i>           | Dilolo   |                                                 |                                                                 | FC27-C (GU075712)                                                                                                |                                          |                           |                                              |                                        |                                                   |                                                                                                                              |                                                                                      |                      |                         |                      |
| Democratic Republic of the Congo | <i>Pan paniscus</i>           | Kesa     |                                                 | [N511+S108N] (GQ859592)                                         |                                                                                                                  |                                          |                           |                                              |                                        |                                                   |                                                                                                                              |                                                                                      |                      |                         |                      |
| Democratic Republic of the Congo | <i>Pan paniscus</i>           | Kikwit   | DRC (L) (GQ355475) [N511+C59R+S108N] (GQ859593) |                                                                 | IC/3D7-C (GU075718)                                                                                              |                                          |                           |                                              |                                        |                                                   |                                                                                                                              |                                                                                      |                      |                         |                      |
| Democratic Republic of the Congo | <i>Pan paniscus</i>           | Lodja    | DRC (A) (GQ355474) [N511+S108N] (GQ859594)      |                                                                 | FC27-A1 (GU075709)<br>FC27-A2 (GU075710)<br>IC/3D7-A1 (GU075714)<br>IC/3D7-A2 (GU075715)<br>IC/3D7-A2 (GU075716) |                                          |                           |                                              |                                        |                                                   |                                                                                                                              |                                                                                      |                      |                         |                      |
| Democratic Republic of the Congo | <i>Pan paniscus</i>           | Opala    | DRC (C) (GQ355473)                              |                                                                 | FC27-B (GU075711)                                                                                                |                                          |                           |                                              |                                        |                                                   |                                                                                                                              |                                                                                      |                      |                         |                      |
| Democratic Republic of the Congo | <i>Pan paniscus</i>           | Mimia    | DRC (E) (GQ355472) [N511+C59R+S108N] (GQ859595) |                                                                 | FC27-D (GU075713)<br>IC/3D7-B (GU075717)                                                                         |                                          |                           |                                              |                                        |                                                   |                                                                                                                              |                                                                                      |                      |                         |                      |
| Democratic Republic of the Congo | <i>Pan paniscus</i>           | Etumbe   |                                                 |                                                                 |                                                                                                                  |                                          |                           |                                              |                                        |                                                   |                                                                                                                              |                                                                                      |                      | DRC (J) (GQ355486)      |                      |
| Democratic Republic of the Congo | <i>Pan paniscus</i>           | Bill     |                                                 |                                                                 |                                                                                                                  |                                          |                           |                                              |                                        |                                                   |                                                                                                                              |                                                                                      |                      | DRC (O) (GQ355485)      |                      |

<sup>a</sup> The non-synonymous mutations found occur in the codons of residues known to be associated with resistance to pyrimethamine in *P. falciparum*.

<sup>b</sup> The species to which the *dhfr*-*ts* sequence(s) was ascribed has been presumed. Confirmation that this is indeed the case awaits further samples with confirmed pure infections with either *P. billbrayi* or *P. billicollinsi*.

<sup>c</sup> At present it is not possible to ascribe any of these four *msp2* block 3 families to either *P. billbrayi* or *P. billicollinsi*.
